# Supplementary material for: Piezocatalytic degradation of 2,4-dichlorophenol in a water environment by a g-C3N4/CdS heterojunction catalyst: interfacial electric field boosting mechanism
Source: Royal Society of Chemistry journal article supplement (doi:10.1039/d3en00563a), 2023-01-01
Supplement: d3en00563a1.pdf [file d3en00563a1.pdf]

# **Piezocatalytic Degradation of 2,4-dichlorophenol in Water Environment by a g-C<sub>3</sub>N<sub>4</sub>/CdS heterojunction catalyst: Interfacial Electric Field Boosting Mechanism**

Qingshen He, Yuyan Yi, Renshu Wang, Pengfei Sun\*, Xiaoping Dong\*

*Department of Chemistry, Key Laboratory of Surface & Interface Science of Polymer Materials of Zhejiang Province, Zhejiang Sci-Tech University, Hangzhou 310018, China*

\* Corresponding author. E-mail addresses: [sunpf@zju.edu.cn](mailto:sunpf@zju.edu.cn) (P. Sun);  
[xpdong@zstu.edu.cn](mailto:xpdong@zstu.edu.cn) (X. Dong)

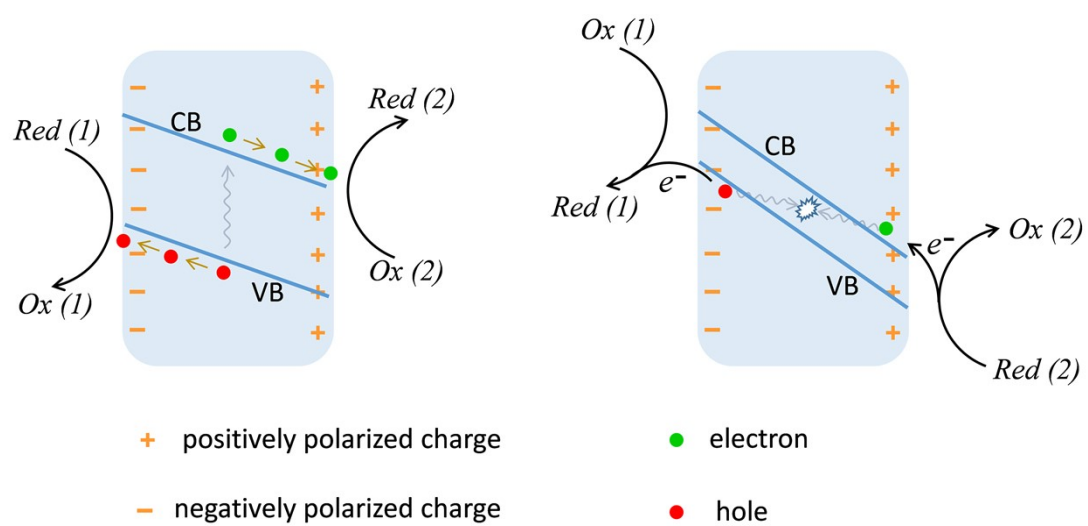

**Fig. S1** Two main piezocatalysis mechanism: (a) the activated electron ( $e^-$ ) and hole ( $h^+$ ) mechanism and (b) the polarization potential mechanism.

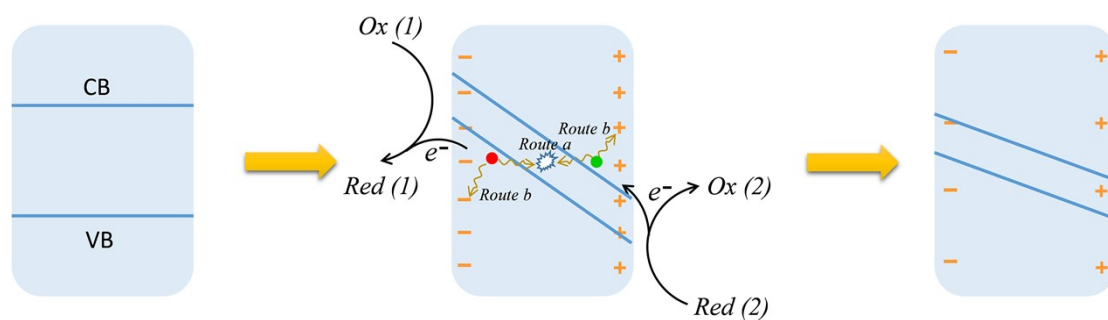

**Fig. S2** The possible mechanism to explain the decline of piezocatalysis performance.

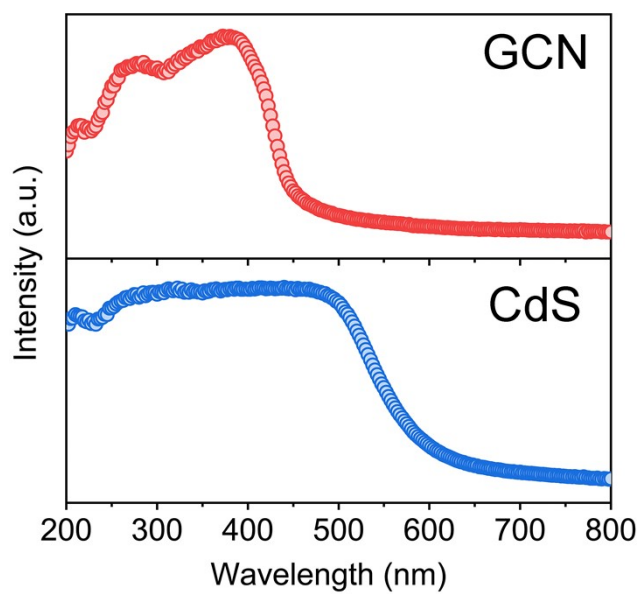

Fig. S3 DRS of GCN and CdS.

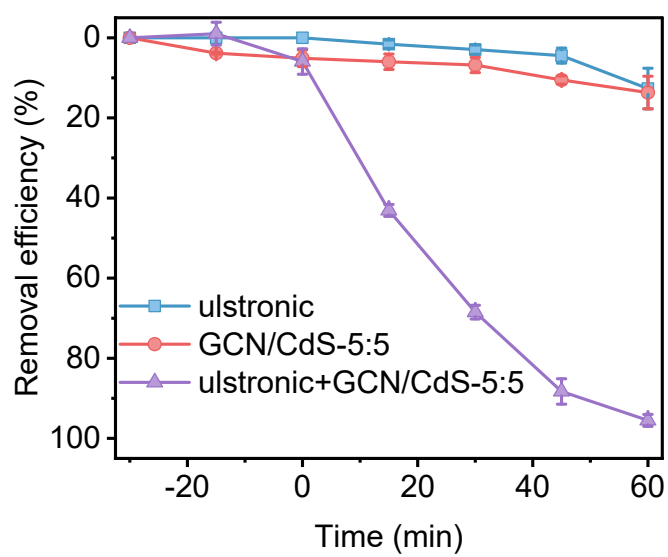

Fig. S4 Degradation of 2,4-DCPs with different reaction conditions.

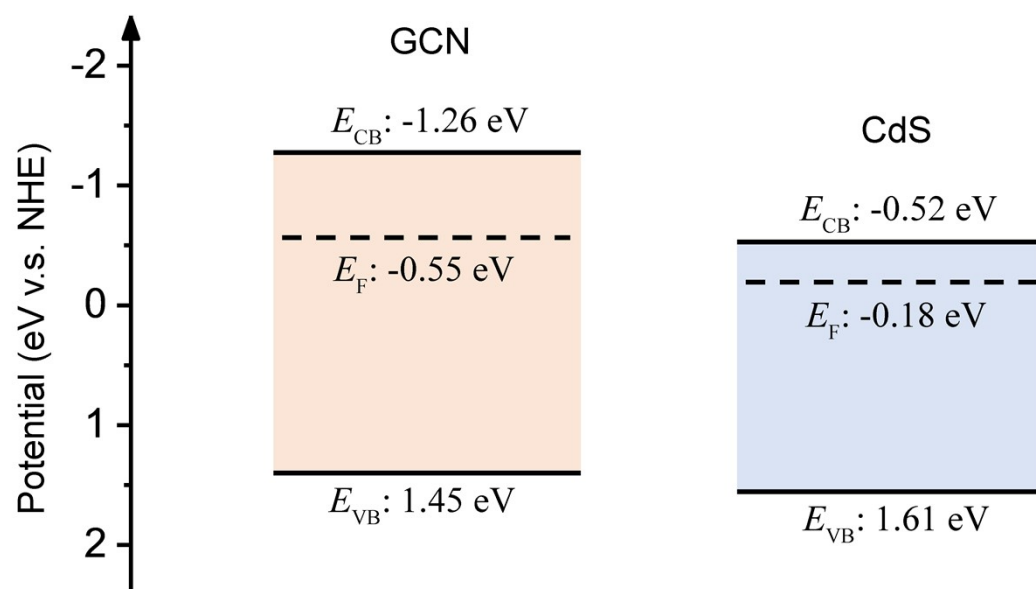

**Fig. S5** Band structures of GCN and CdS

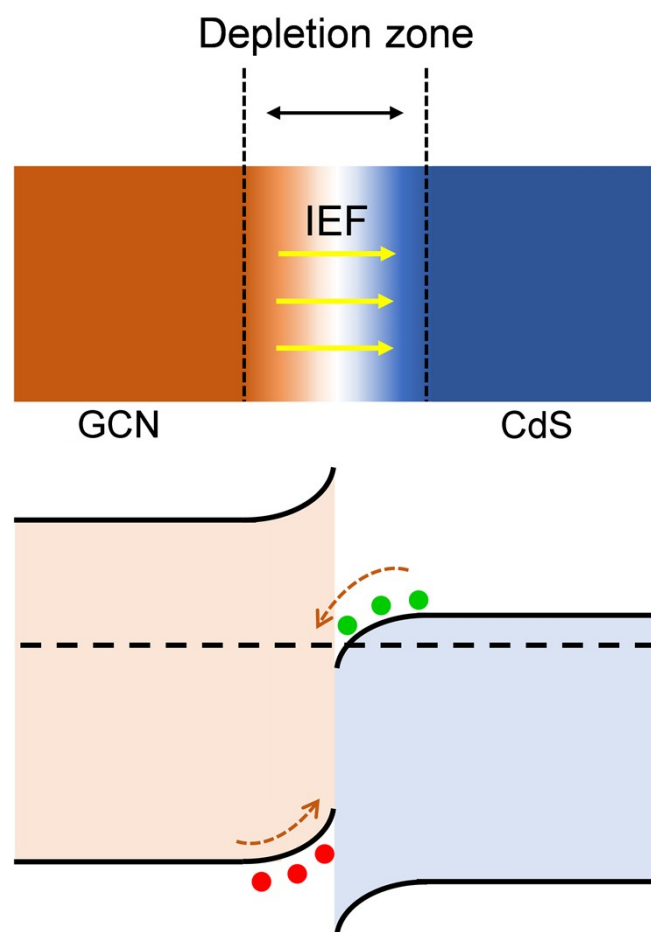

**Fig. S6** S-scheme heterojunction of GCN/CdS

**Table S1** Comparison of piezoelectric catalytic properties of different catalysts.

| Piezocatalysts                                                                     | Reaction condition                             | Degrading substance | Degradation efficiency | Catalysis time<br>Volume | Pollutants concentration/<br>Catalyst dosage | Ref.      |
|------------------------------------------------------------------------------------|------------------------------------------------|---------------------|------------------------|--------------------------|----------------------------------------------|-----------|
| GCN/CdS-5:5                                                                        | ultrasonic (40 kHz, 120 W)                     | 2,4-DCP             | 97%                    | 60 min<br>50 mL          | 20 mg L <sup>-1</sup><br>/50 mg              | This work |
| 2D g-C <sub>3</sub> N <sub>4</sub>                                                 | ultrasonic (40 kHz, 120 W)                     | 2,4-DCP             | 98.5%                  | 150 min<br>25 mL         | 20 mg L <sup>-1</sup><br>/50 mg              | [1]       |
| g- C <sub>3</sub> N <sub>4</sub>                                                   | Xe lamp (300 W) and ultrasonic (40 kHz, 120 W) | 2,4-DCP             | 100%                   | 60 min<br>25 mL          | 20 mg L <sup>-1</sup><br>/50 mg              | [2]       |
| Bi <sub>3.25</sub> La <sub>0.75</sub> Ti <sub>3</sub> O <sub>12</sub>              | Xe lamp (300 W) and ultrasonic (45 kHz, 100 W) | 2,4-DCP             | 93.04 %                | 60 min<br>80 mL          | 15 mg L <sup>-1</sup><br>/70 mg              | [3]       |
| Au/BiVO <sub>4</sub>                                                               | ultrasonic (40 kHz, 300 W)                     | 4-CP                | 100 %                  | 120 min<br>50 mL         | 0.1 mM<br>/25 mg                             | [4]       |
| BaTiO <sub>3</sub>                                                                 | ultrasonic (40 kHz, 110 W)                     | 4-CP                | 71.1 %                 | 120 min<br>25 mL         | 25 mg L <sup>-1</sup><br>/50 mg              | [5]       |
| Bi <sub>25</sub> FeO <sub>40</sub> /Bi <sub>2</sub> O <sub>2</sub> CO <sub>3</sub> | ultrasonic (40 kHz, 120 W)                     | 4-CP                | >90 %                  | 120 min<br>50 mL         | 10 mg L <sup>-1</sup><br>/50 mg              | [6]       |
| Bi <sub>5</sub> Ti <sub>3</sub> FeO <sub>15</sub>                                  | ultrasonic (40 kHz, 120 W)                     | Phenol              | 79.3 %                 | 30 min<br>50 mL          | 5 mg L <sup>-1</sup><br>/50 mg               | [7]       |
| Na <sub>0.5</sub> Bi <sub>0.5</sub> TiO <sub>3</sub>                               | ultrasonic (40 kHz, 80 W)                      | Phenol              | 58.5 %                 | 80 min<br>100 mL         | 5 mg L <sup>-1</sup><br>/100 mg              | [8]       |
| MoS <sub>2</sub> NFs/PMS                                                           | ultrasonic (40 kHz, 300 W)                     | Phenol              | 95 %                   | 180 min<br>100 mL        | 10 mg L <sup>-1</sup><br>/30 mg              | [9]       |

- [1] Lei H., Wu M., Dong X., et al. Efficiently harvesting the ultrasonic vibration energy of two-dimensional graphitic carbon nitride for piezocatalytic degradation of dichlorophenols. *Environmental Science: Nano*, 2021, 8, 1398-1407.
- [2] Lei H., He Q., Wu M., et al. Piezoelectric polarization promoted spatial separation of photoexcited electrons and holes in two-dimensional g-C<sub>3</sub>N<sub>4</sub> nanosheets for efficient elimination of chlorophenols. *Journal of Hazardous Materials*, 2022, 421, 126696.
- [3] Zhong S., Liu L., Liu G., et al. Piezoelectric polarization promoted separation of photogenerated carriers in Bi<sub>3.25</sub>La<sub>0.75</sub>Ti<sub>3</sub>O<sub>12</sub> with different micro-morphologies for efficient elimination of 2,4-Dichlorophenol and tetracycline. *Journal of Cleaner Production*, 2022, 373, 133644.
- [4] Wei Y., Zhang Y., Long M., et al. Efficient bifunctional piezocatalysis of Au/BiVO<sub>4</sub> for simultaneous removal of 4-chlorophenol and Cr (VI) in water. *Applied Catalysis B: Environmental*, 2019, 259, 118084.
- [5] Lan S., Feng J., Xiong Y., et al. Performance and mechanism of piezo-catalytic degradation of 4-chlorophenol: finding of effective piezo-dechlorination. *Environmental Science &*

Technology, 2017, 51, 6560.

- [6] Jiang T., Wang Y., Guo Z., et al.  $\text{Bi}_{25}\text{FeO}_{40}/\text{Bi}_2\text{O}_2\text{CO}_3$  piezoelectric catalyst with built-in electric fields that was prepared via photochemical self-etching of  $\text{Bi}_{25}\text{FeO}_{40}$  for 4-chlorophenol degradation. *Journal of Cleaner Production*, 2022, 341, 130908.
- [7] Zhu X., Wu X., Li Y., et al.  $\text{Bi}_5\text{Ti}_3\text{FeO}_{15}$  Nanofibers for Highly Efficient Piezocatalytic Degradation of Mixed Dyes and Antibiotics. *ACS Applied Nano Materials*, 2023, 6, 5602-5612.
- [8] Huang R., Wu J., Lin E., et al. A new strategy for large-scale synthesis of  $\text{Na}_{0.5}\text{Bi}_{0.5}\text{TiO}_3$  nanowires and their application in piezocatalytic degradation. *Nanoscale Advances*, 2021, 3, 3159-3166.
- [9] Liu S., Jing B., Nie C., et al. Piezoelectric activation of peroxymonosulfate by  $\text{MoS}_2$  nanoflowers for the enhanced degradation of aqueous organic pollutants. *Environmental Science: Nano*, 2021, 8, 784-794.
